# Supplementary material
Source: PubMed Central journal article supplement (PMC7840156)
Supplement: NIHMS1545279-supplement-1.pdf [file NIHMS1545279-supplement-1.pdf]

| #   | Age | Gender | Smoking | Primary cause of death |                                                                  | Past medical history |                                       |        |                          |                     | Tissue processing time         |                                  |                             |                     |
|-----|-----|--------|---------|------------------------|------------------------------------------------------------------|----------------------|---------------------------------------|--------|--------------------------|---------------------|--------------------------------|----------------------------------|-----------------------------|---------------------|
|     |     |        |         | For analysis           | Detail                                                           | Hypertension         | Chronic obstructive pulmonary disease | Cancer | Congestive heart failure | Sepsis before death | Death to ocular cooling, hours | Total ocular cooling time, hours | Death to enucleation, hours | Death to FACS, days |
| 1   | 24  | Male   | 1       | Others                 | Cancer                                                           | 0                    | 0                                     | 1      | 0                        | 0                   |                                |                                  | 6.37                        | 3.94                |
| 2   | 46  | Male   | 0       | Others                 | Cancer                                                           | 1                    | 0                                     | 1      | 0                        | 0                   | 2.10                           | 0.60                             | 3.42                        | 3.57                |
| 3   | 75  | Male   | 1       | Others                 | Gastrointestinal bleeding                                        | 1                    | 1                                     | 0      | 0                        | 0                   | 1.58                           | 2.08                             | 4.30                        | 4.95                |
| 4   | 74  | Male   | 0       | Others                 | Bowel injury, pneumatosis intestinalis                           | 0                    | 1                                     | 0      | 0                        | 0                   | 1.27                           | 2.17                             | 4.27                        | 3.59                |
| 5   | 76  | Female | 0       | Cardiac disease        | Congestive heart failure                                         | 1                    | 0                                     | 0      | 1                        | 0                   | 2.33                           | 5.63                             | 8.58                        | 3.39                |
| 6   | 56  | Female | 0       | Cardiac disease        | Probable myocardial infarction, congestive heart disease         | 1                    | 0                                     | 0      | 1                        | 0                   | 1.55                           | 6.38                             | 9.93                        | 6.18                |
| 7   | 77  | Female | 0       | Cardiac disease        | Cardiogenic shock                                                | 1                    | 0                                     | 1      | 1                        | 0                   | 2.02                           | 5.53                             | 18.82                       | 5.79                |
| 8   | 78  | Female | 0       | Cardiac disease        | Acute Cardiac Event                                              | 1                    | 1                                     | 0      | 1                        | 0                   | 2.62                           | 16.25                            | 19.78                       | 3.68                |
| 9   | 67  | Male   | 0       | Others                 | Sepsis                                                           | 1                    | 1                                     | 1      | 0                        | 1                   | 3.02                           | 1.40                             | 4.92                        | 5.09                |
| 10  | 77  | Male   | 0       | Cardiac disease        | Myocardial infarction                                            | 0                    | 0                                     | 0      | 1                        | 0                   | 9.27                           | 0.38                             | 10.07                       | 3.43                |
| 11  | 79  | Male   | 1       | Others                 | Gastrointestinal bleeding                                        | 1                    | 1                                     | 1      | 0                        | 1                   | 7.47                           | 4.37                             | 12.20                       | 4.70                |
| 12  | 79  | Male   | 0       | Others                 | Cerebral vascular accident                                       | 1                    | 0                                     | 1      | 0                        | 1                   | 2.48                           | 4.10                             | 10.42                       | 4.08                |
| 13  | 76  | Male   | 0       | Others                 | Acute respiratory failure                                        | 1                    | 1                                     | 1      | 0                        | 0                   | 1.70                           | 9.45                             | 11.65                       | 5.65                |
| 14  | 68  | Male   | 0       | Others                 | Sepsis                                                           | 1                    | 1                                     | 0      | 1                        | 1                   | 3.07                           | 13.28                            | 16.78                       | 4.94                |
| 15  | 78  | Male   | 0       | Cardiac disease        | Myocardial infarction                                            | 1                    | 0                                     | 0      | 0                        | 0                   | 14.22                          |                                  | 14.15                       | 3.37                |
| 16  | 69  | Male   | 1       | Others                 | chronic respiratory failure                                      | 1                    | 1                                     | 0      | 0                        | 0                   | 0.92                           | 4.00                             | 5.25                        | 4.94                |
| 17  | 73  | Male   | 0       | Others                 | Sepsis                                                           | 1                    | 1                                     | 1      | 0                        | 1                   |                                |                                  | 3.32                        | 4.25                |
| 18  | 28  | Male   | 0       | Others                 | Acute respiratory distress syndrome, silicone injection syndrome | 0                    | 0                                     | 0      | 0                        | 0                   | 2.70                           | 2.33                             | 5.37                        | 4.37                |
| 19* | 64  | Male   | 0       | Others                 | Multisystem organ failure                                        | 0                    | 0                                     | 0      | 0                        | 0                   | 3.72                           | 3.42                             | 7.53                        | 5.96                |
| 20  | 59  | Male   | 0       | Cardiac disease        | Acute Cardiac Event                                              | 0                    | 0                                     | 0      | 0                        | 0                   | 2.02                           | 3.37                             | 6.33                        | 3.52                |
| 21  | 46  | Male   | 0       | Others                 | Subarachnoid hemorrhage                                          | 1                    | 0                                     | 0      | 0                        | 0                   | 3.73                           | 1.33                             | 5.73                        | 2.86                |

\* A patient with scleroderma.
