# Supplementary material
Source: PubMed Central journal article supplement (PMC7840156)
Supplement: NIHMS1545279-supplement-2.pdf [file NIHMS1545279-supplement-2.pdf]

| # | Age | Gender | Smoking | Primary cause of death |                                       | Past medical history |                                       |        |                          |                     | Tissue processing time         |                                  |                             |                                     |
|---|-----|--------|---------|------------------------|---------------------------------------|----------------------|---------------------------------------|--------|--------------------------|---------------------|--------------------------------|----------------------------------|-----------------------------|-------------------------------------|
|   |     |        |         | For analysis           | Detail                                | Hypertension         | Chronic obstructive pulmonary disease | Cancer | Congestive heart failure | Sepsis before death | Death to ocular cooling, hours | Total ocular cooling time, hours | Death to enucleation, hours | Death to colony forming assay, days |
| 1 | 78  | Female | 0       | Cardiac disease        | Acute Cardiac Event                   | 1                    | 1                                     | 0      | 0                        | 0                   | 2.83                           | 1.75                             | 8.50                        | 2.92                                |
| 2 | 67  | Female | 1       | Cardiac disease        | Congestive heart failure              | 0                    | 1                                     | 0      | 1                        | 0                   |                                |                                  | 2.92                        | 2.50                                |
| 3 | 73  | Male   | 0       | Cardiac disease        | Congestive heart failure              | 1                    | 0                                     | 0      | 1                        | 0                   | 1.77                           | 7.98                             | 10.08                       | 2.02                                |
| 4 | 55  | Male   | 1       | Others                 | Sepsis                                | 1                    | 0                                     | 0      | 0                        | 1                   | 2.35                           | 3.37                             | 6.18                        | 5.65                                |
| 5 | 64  | Female | 1       | Others                 | Pneumonia                             | 1                    | 0                                     | 0      | 0                        | 0                   | 2.98                           | 10.33                            | 14.15                       | 3.64                                |
| 6 | 54  | Male   | 0       | Others                 | Sepsis                                | 0                    | 0                                     | 0      | 0                        | 1                   | 3.98                           | 7.03                             | 11.50                       | 2.74                                |
| 7 | 77  | Female | 1       | Others                 | Chronic obstructive pulmonary disease | 1                    | 1                                     | 1      | 0                        | 0                   | 2.83                           | 19.67                            | 23.13                       | 4.77                                |
